# Supplementary material for: A critical review of anthropological studies on skeletons from European plague pits of different epochs
Source: PubMed Central journal article supplement (PMC6281611; doi:10.1038/s41598-018-36201-w), 2018-12-05
Supplement: 41598_2018_36201_MOESM1_ESM.pdf [file 41598_2018_36201_MOESM1_ESM.pdf]

## Electronic Supplementary Material

### **A critical review of anthropological studies on skeletons from European plague pits of different epochs.**

Bramanti B<sup>1,2,3</sup>, Zedda N<sup>1\*</sup>, Rinaldo N<sup>1\*</sup>, Gualdi-Russo E<sup>1</sup>

<sup>1</sup>Department of Biomedical and Specialty Surgical Sciences, University of Ferrara, Ferrara, Italy

<sup>2</sup>Centre for Ecological and Evolutionary Synthesis, Department of Biosciences, University of Oslo, Oslo, Norway

<sup>3</sup>University Center for Studies on Gender Medicine, University of Ferrara, Ferrara, Italy

\*Corresponding authors

### Supplementary Table S1

#### Studies on skeletal remains of plague victims

| Author                                | Site                                   | Country | Period                                 |                      | n° ind. | Burial Type* | Basis of Plague determination |                 |                  | Anthropological studies |     |             |                           | note                       | Included |
|---------------------------------------|----------------------------------------|---------|----------------------------------------|----------------------|---------|--------------|-------------------------------|-----------------|------------------|-------------------------|-----|-------------|---------------------------|----------------------------|----------|
|                                       |                                        |         | Date                                   | C <sup>14</sup>      |         |              | DNA                           | Immun.          | Historical texts | sex                     | age | pathologies | Biological Stress markers |                            |          |
| Staskiewicz 2007 <sup>1</sup>         | Aschheim                               | Germany | 5 <sup>th</sup> -7 <sup>th</sup> cent. | 530-630 <sub>2</sub> | 77      | Mult         | ✓ <sub>3</sub>                |                 |                  | ✓                       | ✓   | ✓           |                           |                            | x        |
| Seifert 2014 <sup>2</sup> PhD thesis  | Aschheim                               | Germany | 5 <sup>th</sup> -7 <sup>th</sup> cent. | 530-630              | 19      | Mult         | ✓ <sub>3</sub>                |                 |                  | ✓                       | ✓   |             |                           |                            |          |
| Helmuth and Ankner, 1996 <sup>4</sup> | Altenerding                            | Germany | 5 <sup>th</sup> -7 <sup>th</sup> cent. |                      | 20      | Ind+Mult     | ✓ <sub>3</sub>                |                 |                  | ✓                       | ✓   |             |                           | 1                          | x        |
| Castex, 2007 <sup>5</sup>             | Le Clos des Cordeliers, Sens, Yonne    | France  | 5 <sup>th</sup> -6 <sup>th</sup> cent. |                      | 68      | Mult         | ✓ <sub>6</sub>                | ✓ <sub>7</sub>  |                  |                         | ✓   |             |                           | Graph with mortality rates |          |
| Castex, 2008 <sup>8</sup>             | Le Clos des Cordeliers, Sens, Yonne    | France  | 5 <sup>th</sup> -6 <sup>th</sup> cent. |                      | 73      | Mult         | ✓ <sub>6</sub>                | ✓ <sub>7</sub>  |                  | ✓                       | ✓   |             |                           | Graph with mortality rates |          |
| Castex, Kacki, 2016 <sup>9</sup>      | Le Clos des Cordeliers, Sens, Yonne    | France  | 5 <sup>th</sup> -6 <sup>th</sup> cent. |                      | 73      | Mult         | ✓ <sub>6</sub>                | ✓ <sub>7</sub>  |                  | ✓                       | ✓   |             |                           |                            | x        |
| Castex, Kacki, 2016 <sup>9</sup>      | Poitiers, Poitou-Charentes             | France  | 5 <sup>th</sup> -6 <sup>th</sup> cent. |                      | 53      | Mult         |                               |                 |                  |                         |     |             |                           |                            |          |
| Signoli et al. 2009 <sup>10</sup>     | Place Camille Jouffray, Vienne (Isère) | France  | 760-880                                | 610-1040             | 11      | Mult         | ✓ <sub>11</sub>               | ✓ <sub>12</sub> |                  | ✓                       | ✓   |             |                           |                            | x        |
| Rubini 1991 <sup>13</sup>             | Castro dei Volsci, Frosinone           | Italy   | 6 <sup>th</sup> cent.                  |                      | 148     | Mult         |                               |                 |                  | ✓                       | ✓   | ✓           | ✓                         |                            |          |
| Rubini et al. 2016 <sup>14</sup>      | Castro dei Volsci, Frosinone           | Italy   | 6 <sup>th</sup> cent.                  |                      | 179     | Mult         |                               |                 |                  | ✓                       | ✓   |             |                           |                            |          |
| Waldron 1992 <sup>15</sup>            | Royal Mint, East Smithfield, London    | UK      | 1348                                   |                      | 600     | Mult         | ✓ <sub>16</sub>               |                 |                  | ✓                       | ✓   | ✓           |                           |                            | x        |
| Waldron 2001 <sup>17</sup>            | Royal Mint, East Smithfield, London    | UK      | 1348                                   |                      | 600     | Mult         | ✓ <sub>16</sub>               |                 |                  | ✓                       | ✓   | ✓           |                           |                            | x        |

| Author                                       | Site                                         | Country | Period                 |                         | n° ind. | Burial Type* | Basis of Plague determination |                 |                  | Anthropological studies |     |             |                          | note                                 | Included |
|----------------------------------------------|----------------------------------------------|---------|------------------------|-------------------------|---------|--------------|-------------------------------|-----------------|------------------|-------------------------|-----|-------------|--------------------------|--------------------------------------|----------|
|                                              |                                              |         | Date                   | C <sup>14</sup>         |         |              | DNA                           | Immun.          | Historical texts | sex                     | age | pathologies | Biological Stress marker |                                      |          |
| Margerison and Knüsel, 2002 <sup>18</sup>    | Royal Mint, East Smithfield, London          | UK      | 1349                   |                         | 473     | Mult         | ✓ <sub>16</sub>               |                 |                  |                         | ✓   | ✓           |                          |                                      |          |
| Gowland and Chamberlain, 2005 <sup>19</sup>  | Royal Mint, East Smithfield, London          | UK      | 1348                   |                         | 600     | Mult         | ✓ <sub>16</sub>               |                 |                  |                         |     | ✓           |                          | Graph with percentage of age classes |          |
| DeWitte, 2006 <sup>20</sup><br>PhD thesis    | Royal Mint, East Smithfield, London          | UK      | 14 <sup>th</sup> cent. |                         | 491     | Mult         | ✓ <sub>16</sub>               |                 |                  |                         | ✓   | ✓           | ✓                        |                                      |          |
| DeWitte, 2010 <sup>21</sup>                  | Royal Mint, East Smithfield, London          | UK      | 14 <sup>th</sup> cent. |                         | 299     | Mult         | ✓ <sub>16</sub>               |                 |                  |                         | ✓   |             | ✓                        |                                      |          |
| DeWitte, 2010b <sup>22</sup>                 | Royal Mint, East Smithfield, London          | UK      | 14 <sup>th</sup> cent. |                         | 337     | Mult         | ✓ <sub>16</sub>               |                 |                  |                         |     | ✓           |                          | Graph with percentage of age classes |          |
| De Witte 2012 <sup>23</sup>                  | Royal Mint, East Smithfield, London          | UK      | 14 <sup>th</sup> cent. |                         | 161     | Mult         | ✓ <sub>16</sub>               |                 |                  |                         |     | ✓           | ✓                        | analysis of periodontal diseases     | x        |
| DeWitte and Hughes-Morey, 2012 <sup>24</sup> | Royal Mint, East Smithfield, London          | UK      | 14 <sup>th</sup> cent. |                         | 127     | Mult         | ✓ <sub>16</sub>               |                 |                  |                         | ✓   |             | ✓                        |                                      |          |
| De Witte, Slavin 2013 <sup>25</sup>          | Royal Mint, East Smithfield, London          | UK      | 14 <sup>th</sup> cent. |                         | 491     | Mult         | ✓ <sub>16</sub>               |                 |                  |                         |     |             | ✓                        |                                      | x        |
| Rubini et al. 2016 <sup>14</sup>             | Royal Mint, East Smithfield, London          | UK      | 1348-1350              |                         | 636     | Mult         | ✓ <sub>16</sub>               |                 |                  |                         |     | ✓           |                          | Graph with percentage of age classes |          |
| Grainger and Phillipotts, 2011 <sup>26</sup> | St Mary Grace Abbey, East Smithfield, London | UK      | 1350-1400              |                         | 199     | Ind          | ✓ <sub>3,16</sub>             |                 |                  |                         | ✓   | ✓           | ✓                        |                                      |          |
| Kacki 2016 <sup>27</sup><br>PhD thesis       | Hereford cathedral                           | UK      | 14 <sup>th</sup> cent. | 1281-1389 <sup>28</sup> | 185     | Mult         | ✓ <sub>28</sub>               | ✓ <sub>28</sub> |                  |                         | ✓   | ✓           | ✓                        |                                      | x        |
| Castex, Kacki, 2016 <sup>29</sup>            | Hereford cathedral                           | UK      | 14 <sup>th</sup> cent. | 1281-1389 <sup>28</sup> | 185     | Mult         | ✓ <sub>28</sub>               | ✓ <sub>28</sub> |                  |                         | ✓   | ✓           |                          |                                      |          |
| Prechel 1996 <sup>30</sup>                   | Lubeck                                       | Germany | 14 <sup>th</sup> cent. | 1260-1390               | 671     | Mult         |                               |                 |                  |                         | ✓   | ✓           |                          |                                      |          |

| Author                               | Site                                         | Country | Period                 |                                      | n° ind. | Burial Type* | Basis of Plague determination |        |                  | Anthropological studies |     |             |                          | note                         | Included |
|--------------------------------------|----------------------------------------------|---------|------------------------|--------------------------------------|---------|--------------|-------------------------------|--------|------------------|-------------------------|-----|-------------|--------------------------|------------------------------|----------|
|                                      |                                              |         | Date                   | C <sup>14</sup>                      |         |              | DNA                           | Immun. | Historical texts | sex                     | age | pathologies | Biological Stress marker |                              |          |
| Lütgert, 2000 <sup>31</sup>          | Lubeck                                       | Germany | 14 <sup>th</sup> cent. | 1260-1390                            | 816     | Mult         |                               |        |                  | ✓                       | ✓   |             |                          | not all are plague's victims |          |
| Wiechmann et al. 2010 <sup>32</sup>  | Manching Pichl, Ingolstadt                   | Germany | 1250-1500              |                                      | 6       | Mult         | ✓<br>32                       |        |                  | ✓                       | ✓   |             |                          |                              |          |
| Seifert 2014 <sup>2</sup> PhD thesis | Manching Pichl, Ingolstadt                   | Germany | 1250-1500              |                                      | 21      | Mult         | ✓<br>32                       |        |                  | ✓                       | ✓   |             |                          |                              | x        |
| Castex 2007 <sup>5</sup>             | Saint-Pierre de Dreux (Eure-et-Loire)        | France  | 14 <sup>th</sup> cent. |                                      | 72      | Mult         | ✓<br>6                        |        |                  |                         | ✓   |             |                          | Graph with mortality rates   |          |
| Castex 2008 <sup>8</sup>             | Saint-Pierre de Dreux (Eure-et-Loire)        | France  | 14 <sup>th</sup> cent. |                                      | 72      | Mult         | ✓<br>6                        |        |                  | ✓                       | ✓   |             |                          | Graph with mortality rates   |          |
| Castex, Kacki, 2016 <sup>29</sup>    | Saint-Pierre de Dreux (Eure-et-Loire)        | France  | 14 <sup>th</sup> cent. |                                      | 72      | Mult         | ✓<br>6                        |        |                  | ✓                       | ✓   |             |                          |                              |          |
| Kacki 2016 <sup>27</sup> PhD thesis  | Saint-Pierre de Dreux (Eure-et-Loire)        | France  | 14 <sup>th</sup> cent. |                                      | 69      | Mult         | ✓<br>6                        |        |                  | ✓                       | ✓   | ✓           | ✓                        |                              | x        |
| Passarius et al. 2008 <sup>33</sup>  | Vilarnau                                     | France  | 14 <sup>th</sup> cent. |                                      | 19      | Mult         | ✓                             |        |                  | ✓                       | ✓   |             |                          |                              | x        |
| Le Forestier 2012 <sup>34</sup>      | Bondy                                        | France  | 14 <sup>th</sup> cent. | 1297-1373                            | 12      | Mult         | ✓<br>35                       | ✓<br>7 |                  | ✓                       |     |             |                          |                              | x        |
| Kacki et al., 2011 <sup>36</sup>     | Saint-Laurent-de-la-Cabrerisse               | France  | 14 <sup>th</sup> cent. | 1279-1409                            | 13      | Ind+Mult     | ✓<br>28                       | ✓      |                  | ✓                       | ✓   |             |                          |                              | x        |
| Crubezy et al. 2006 <sup>37</sup>    | Saints-Côme-et-Damien, Montpellier           | France  | 14 <sup>th</sup> cent. |                                      | 13      | Mult         | ✓<br>38                       |        |                  | ✓                       | ✓   |             |                          |                              | x        |
| Kacki, Castex 2004 <sup>39</sup>     | Basilica dels Sants Just i Pastor, Barcelona | Spain   | 14 <sup>th</sup> cent. | 14 <sup>th</sup> cent. <sup>40</sup> | 120     | Mult         | ✓<br>41                       |        |                  | ✓                       | ✓   | ✓           | ✓                        |                              | x        |
| Castex, Kacki, 2016 <sup>29</sup>    | Basilica dels Sants Just i Pastor, Barcelona | Spain   | 14 <sup>th</sup> cent. | 14 <sup>th</sup> cent. <sup>40</sup> | 120     | Mult         | ✓<br>41                       |        |                  | ✓                       | ✓   |             |                          |                              |          |

| Author                               | Site                         | Country | Period                                   |                         | n° ind. | Burial Type* | Basis of Plague determination |         |                  | Anthropological studies |     |             |                          | note                       | Included |
|--------------------------------------|------------------------------|---------|------------------------------------------|-------------------------|---------|--------------|-------------------------------|---------|------------------|-------------------------|-----|-------------|--------------------------|----------------------------|----------|
|                                      |                              |         | Date                                     | C <sup>14</sup>         |         |              | DNA                           | Immun.  | Historical texts | sex                     | age | pathologies | Biological Stress marker |                            |          |
| Gambaro et al. 2001 <sup>42</sup>    | Lazzaretto Vecchio, Venice   | Italy   | 14 <sup>th</sup> -17 <sup>th</sup> cent. |                         | 331     | Mult         | ✓<br>43                       | ✓<br>7  | ✓                |                         | ✓   |             |                          |                            | x        |
| Signoli et al., 2008 <sup>44</sup>   | Lazzaretto Vecchio, Venice   | Italy   | 1478-1486                                |                         | 184     | Mult         | ✓<br>43                       | ✓<br>7  | ✓                |                         | ✓   |             |                          |                            |          |
| Bizot 2005 <sup>45</sup>             | Les Fedons, Lambesc          | France  | 1590                                     |                         | 133     | Ind+Mult     | ✓<br>46                       | ✓<br>12 | ✓                | ✓                       | ✓   |             |                          |                            |          |
| Castex 2007 <sup>5</sup>             | Les Fedons, Lambesc          | France  | 16 <sup>th</sup> cent.                   |                         | 133     | Ind+Mult     | ✓<br>46                       | ✓<br>12 | ✓<br>45          |                         | ✓   |             |                          | Graph with mortality rates |          |
| Castex 2008 <sup>8</sup>             | Les Fedons, Lambesc          | France  | 16 <sup>th</sup> cent.                   |                         | 133     | Ind+Mult     | ✓<br>46                       | ✓<br>12 | ✓<br>45          | ✓                       | ✓   |             |                          | Graph with mortality rates |          |
| Bianucci et al. 2008 <sup>12</sup>   | Les Fedons, Lambesc          | France  | 1590                                     |                         | 133     | Ind+Mult     | ✓<br>46                       | ✓       | ✓<br>45          | ✓                       |     |             |                          |                            |          |
| Kacki 2016 <sup>27</sup> PhD thesis  | Les Fedons, Lambesc          | France  | 16 <sup>th</sup> cent.                   |                         | 133     | Ind+Mult     | ✓<br>46                       | ✓<br>12 | ✓<br>45          | ✓                       | ✓   | ✓           | ✓                        |                            | x        |
| Castex, Kacki, 2016 <sup>29</sup>    | Les Fedons, Lambesc          | France  | 16 <sup>th</sup> cent.                   |                         | 133     | Ind+Mult     | ✓<br>46                       | ✓<br>12 | ✓<br>45          | ✓                       | ✓   |             |                          |                            |          |
| Bianucci et al., 2009 <sup>47</sup>  | Sainte-Croix Abbey, Poitiers | France  | After 1524                               |                         | 6       | Ind          |                               | ✓       |                  | ✓                       | ✓   |             |                          |                            |          |
| Boucherie et al. 2016 <sup>48</sup>  | Maria Troon, Dendermonde     | Belgium | 1579-1584                                | 1455-1632 <sup>27</sup> | 99      | Ind+Mult     |                               |         | ✓<br>49          | ✓                       | ✓   |             | ✓                        |                            | x        |
| Kacki 2016 <sup>27</sup> PhD thesis  | Maria Troon, Dendermonde     | Belgium | 16 <sup>th</sup> cent.                   | 1455-1632 <sup>27</sup> | 99      | Ind+Mult     |                               |         | ✓<br>49          | ✓                       | ✓   | ✓           | ✓                        |                            | x        |
| Castex, Kacki, 2016 <sup>29</sup>    | Maria Troon, Dendermonde     | Belgium | 16 <sup>th</sup> cent.                   | 1455-1632 <sup>27</sup> | 99      | Ind+Mult     |                               |         | ✓<br>49          | ✓                       | ✓   |             |                          |                            |          |
| Milanese, 2010 <sup>50</sup>         | Lo Quarter, Alghero          | Italy   | 1582-1583                                |                         | 185     | Mult         |                               | ✓<br>51 |                  |                         | ✓   | ✓           |                          |                            | x        |
| Bianucci et al. 2012 <sup>51</sup>   | Lo Quarter, Alghero          | Italy   | 1582-1583                                |                         | 10      | Mult         |                               | ✓       |                  |                         | ✓   | ✓           |                          |                            |          |
| Seifert 2014 <sup>2</sup> PhD thesis | Brandenburg                  | Germany | 1618-1648                                |                         | 9       | Mult         | ✓                             |         |                  |                         | ✓   | ✓           |                          |                            |          |
| Signoli et al. 2007 <sup>52</sup>    | Puy St. Pierre, Lariéy       | France  | 17 <sup>th</sup> cent.                   |                         | 34      | Ind+Mult     |                               | ✓<br>12 |                  |                         | ✓   | ✓           |                          |                            |          |
| Bianucci et al. 2008 <sup>12</sup>   | Puy St. Pierre, Lariéy       | France  | 1628-1632                                |                         | 34      | Ind+Mult     |                               | ✓       |                  |                         | ✓   | ✓           |                          |                            |          |
| Ardagna et al. 2012 <sup>53</sup>    | Puy St. Pierre, Lariéy       | France  | 1629-1630                                |                         | 34      | Ind+Mult     |                               | ✓<br>12 |                  |                         | ✓   | ✓           | ✓                        |                            | x        |
| Bianucci et al. 2009                 | La Chaize-le-Vicomte         | France  | 1600-1700                                |                         | 6       | Mult         |                               | ✓       |                  |                         | ✓   | ✓           |                          |                            |          |

| Author                                 | Site                                       | Country | Period                 |                 | n° ind. | Burial Type* | Basis of Plague determination |                 |                    | Anthropological studies |     |             |                          | note                                 | Included |
|----------------------------------------|--------------------------------------------|---------|------------------------|-----------------|---------|--------------|-------------------------------|-----------------|--------------------|-------------------------|-----|-------------|--------------------------|--------------------------------------|----------|
|                                        |                                            |         | Date                   | C <sup>14</sup> |         |              | DNA                           | Immun.          | Historical texts   | sex                     | age | pathologies | Biological Stress marker |                                      |          |
| Bianucci et al. 2008                   | La Butte aux Herbes, Draguignan            | France  | 1649-1650              |                 | 8       | Mult         | ✓                             | ✓               |                    | ✓                       | ✓   |             |                          |                                      |          |
| Hadjouis et al., 2006 <sup>54</sup>    | Saint-Maurice, Charenton le Pont           | France  | 17 <sup>th</sup> cent. |                 | 3       | Ind          | ✓                             |                 |                    |                         | ✓   | ✓           |                          |                                      |          |
| Rinaldo et al. 2014 <sup>55</sup>      | Osservanza, Imola                          | Italy   | 1629-1630              |                 | 92      | Mult         |                               | ✓ <sub>14</sub> | ✓ <sub>56</sub>    | ✓                       | ✓   | ✓           | ✓                        | Only dental pathologies              | x        |
| Rubini et al. 2016 <sup>14</sup>       | Osservanza, Imola                          | Italy   | 1629-1630              |                 | 114     | Mult         |                               | ✓ <sub>14</sub> | ✓ <sub>56</sub>    |                         | ✓   |             |                          |                                      |          |
| Caruso et al., 2013 <sup>57</sup>      | Viale Sabotino, Milan                      | Italy   | 17 <sup>th</sup> cent. |                 | 240     | Mult         |                               |                 |                    | ✓                       | ✓   | ✓           | ✓                        |                                      |          |
| Fiscella et al. 2008 <sup>67</sup>     | Copenhagen                                 | Denmark | 1711-1712              |                 | 24      | Ind+Mult     |                               |                 | ✓                  |                         | ✓   | ✓           |                          |                                      | x        |
| Dutour et al. 1994 <sup>58</sup>       | Rue Leca, Marseille                        | France  | 1720-1722              |                 | 22      | Mult         | ✓ <sub>59</sub>               | ✓ <sub>12</sub> | ✓                  | ✓                       | ✓   |             |                          |                                      |          |
| Signoli and Dutour, 1997 <sup>60</sup> | Rue Leca, l'Observance, Marseille          | France  | 1720-1722              |                 | 22      | Mult         | ✓ <sub>59</sub>               | ✓ <sub>12</sub> | ✓ <sub>58</sub>    | ✓                       | ✓   |             |                          |                                      | x        |
| Signoli and Dutour, 1998 <sup>60</sup> | Rue Leca, l'Observance, Marseille          | France  | 1720-1722              |                 | 303     | Mult         | ✓ <sub>59</sub>               | ✓ <sub>12</sub> | ✓ <sub>58</sub>    |                         | ✓   |             |                          |                                      |          |
| Bello et al. 2006 <sup>61</sup>        | L'Observance, Marseille                    | France  | 1722                   |                 | 179     | Mult         | ✓ <sub>59</sub>               | ✓ <sub>12</sub> | ✓ <sub>58</sub>    | ✓                       | ✓   |             |                          |                                      | x        |
| Bianucci et al. 2008 <sup>12</sup>     | L'Observance, Marseille                    | France  | 1722                   |                 | 172     | Mult         | ✓ <sub>59</sub>               | ✓               | ✓ <sub>58</sub>    |                         |     |             |                          |                                      |          |
| Signoli et al., 2002 <sup>62</sup>     | L'Observance, Marseille                    | France  | 1720                   |                 | 216     | Mult         | ✓ <sub>59</sub>               | ✓ <sub>12</sub> | ✓ <sub>58</sub>    |                         | ✓   |             |                          | Graph with percentage of age classes |          |
| Signoli, 2008 <sup>63</sup>            | L'Observance, Marseille                    | France  | 1720                   |                 | 216     | Mult         | ✓ <sub>59</sub>               | ✓ <sub>12</sub> | ✓ <sub>58</sub>    |                         | ✓   |             |                          | Graph with percentage of age classes |          |
| Chaumoitre et al. 2007 <sup>64</sup>   | Delos, Martigues + L'observance, Marseille | France  | 1720-1722              |                 | 113     | Mult         | ✓ <sub>59</sub>               | ✓ <sub>12</sub> | ✓ <sub>58,65</sub> |                         | ✓   |             | ✓                        |                                      | x        |
| Signoli et al., 1995 <sup>65</sup>     | Le Delos, Martigues                        | France  | 1720-1722              |                 | 39      | Mult         |                               | ✓ <sub>12</sub> | ✓ <sub>65</sub>    | ✓                       | ✓   |             |                          |                                      |          |

|                                      |                                                 |        |           |  |     |      |         |         |         |   |   |  |  |  |   |
|--------------------------------------|-------------------------------------------------|--------|-----------|--|-----|------|---------|---------|---------|---|---|--|--|--|---|
| Bianucci et al. 2008 <sup>12</sup>   | Le Delos, Martigues                             | France | 1720-1722 |  | 39  | Mult |         | ✓<br>12 | ✓<br>65 | ✓ | ✓ |  |  |  | x |
| Bianucci et al. 2008 <sup>12</sup>   | Le Couvent des Capucins de Ferrieres, Martigues | France | 1720-1722 |  | 210 | Mult | ✓<br>11 | ✓       | ✓<br>66 |   |   |  |  |  |   |
| Tzortzis, Signoli 2009 <sup>66</sup> | Le Couvent des Capucins de Ferrieres, Martigues | France | 1720-1722 |  | 208 | Mult | ✓<br>11 | ✓<br>12 | ✓       | ✓ | ✓ |  |  |  | x |

<sup>1</sup>In Feldman et al. (2016), to seek for *Y. pestis*' DNA, the authors use samples from 10 out of the 16 double burials found in the early-medieval (5<sup>th</sup>-7<sup>th</sup> century) cemetery of Altenerding. From the names of the burials reported in the supplementary information of the paper, we could reconstruct the sex attribution and age-at-death of all the individual in a catalogue<sup>4</sup>. Yet, in the same catalogue, the 20 inhumations are attributed to different periods (6<sup>th</sup> and 7<sup>th</sup> c.). Since only two individuals (1175, 1176) were positive to molecular analyses, we cannot be sure that all the 20 individuals died for plague. For this reason, we have decided to exclude the site from the statistics, although a genome of the etiological agent is published.

**Supplementary Table S2**

**Studies on skeletal remains of plague victims: skeletal bio-markers**

**Skeletal Markers of Biological Stress**

| Geographic area  | Site                                        | Period                                 | Sample n. | Low Stature | Cribra Orbit.     | Porotic Hyperost. | Hypopl.            | Harris lines | Periostitis       | Endocr. Remodeling | Osteoarthritis                     | Co-morbidities %               | Ref.  |
|------------------|---------------------------------------------|----------------------------------------|-----------|-------------|-------------------|-------------------|--------------------|--------------|-------------------|--------------------|------------------------------------|--------------------------------|-------|
| Southern Germany | Aschheim                                    | 5 <sup>th</sup> -7 <sup>th</sup> cent. | 77        |             | 12/77             |                   | 7/77               |              |                   |                    |                                    |                                | 1     |
| UK               | Royal Mint, East Smithfield, London         | 14 <sup>th</sup>                       | 491       | A 5/ 44     | A 17/ 93          | A 85/ 94          | A 74/ 98           |              |                   |                    |                                    | Periodontal disease:<br>80/ 81 | 23,25 |
| UK               | Royal Mint, East Smithfield, London         | 1348-1349                              | 600       |             |                   |                   |                    |              |                   |                    | 15-45+:<br>M=(29.9%)<br>F= (19.4%) |                                | 15    |
| UK               | Hereford                                    | 14 <sup>th</sup>                       | 185       |             | A 4/31<br>S 16/38 | A 12/36<br>S 7/50 | A 33/37<br>S 39/48 |              | A 32/78<br>S 6/40 | 2/88               |                                    |                                | 27    |
| Northern France  | Saint-Pierre de Dreux (Eure-et-Loire)       | 14 <sup>th</sup>                       | 69        |             | A 5/16<br>S 10/16 | A 5/ 23<br>S 3/17 | A 9/16<br>S 9/15   |              | A 8/16<br>S 4/19  | A 1/13<br>S 5/ 30  |                                    |                                | 27    |
| Spain            | Basilica del Sants Just i Pastor, Barcelona | 14 <sup>th</sup>                       | 120       |             | A 1/ 9<br>S 2/10  | A 1/11<br>S 1/13  | A 4/ 9<br>S 9/15   |              |                   |                    |                                    | Caries: 2/ 9                   | 39    |
| Belgium          | Maria Troon, Dendermonde                    | 16 <sup>th</sup>                       | 99        |             | A 9/25<br>S 12/23 | A 7/29<br>S 8/30  | A 15/20<br>S 24/30 | 36/ 69       | A 8/24<br>S 16/27 | A 4/24<br>S 2/21   |                                    |                                | 27,48 |



|                 |                                            |                  |     |  |                   |  |                    |         |                  |         |  |                                          |    |
|-----------------|--------------------------------------------|------------------|-----|--|-------------------|--|--------------------|---------|------------------|---------|--|------------------------------------------|----|
| Southern France | Les Fedons, Lambesc                        | 16 <sup>th</sup> | 133 |  | A 9/45<br>S 13/30 |  | A 42/55<br>S 34/53 |         |                  | S 1/ 34 |  |                                          | 27 |
| Southern France | Puy St. Pierre, Lariey                     | 1629-1630        | 34  |  |                   |  | A 1/17<br>S 2/17   |         | A 2/17<br>S 4/17 |         |  | Tuberculosis:<br>1/ 34                   | 53 |
| Northern Italy  | Osservanza, Imola                          | 1629-1630        | 92  |  |                   |  | 51/ 92             |         |                  |         |  | Caries: 65%<br>Tartar: 53%<br>Abscess:9% | 55 |
| Denmark         | Copenhagen                                 | 1711-1712        | 24  |  |                   |  |                    | 3/ 24   |                  |         |  |                                          | 67 |
| Southern France | Delos, Martigues + L'observance, Marseille | 1720-1722        | 113 |  |                   |  |                    | 72/ 113 |                  |         |  |                                          | 64 |

A=Adult; S=SubAdult

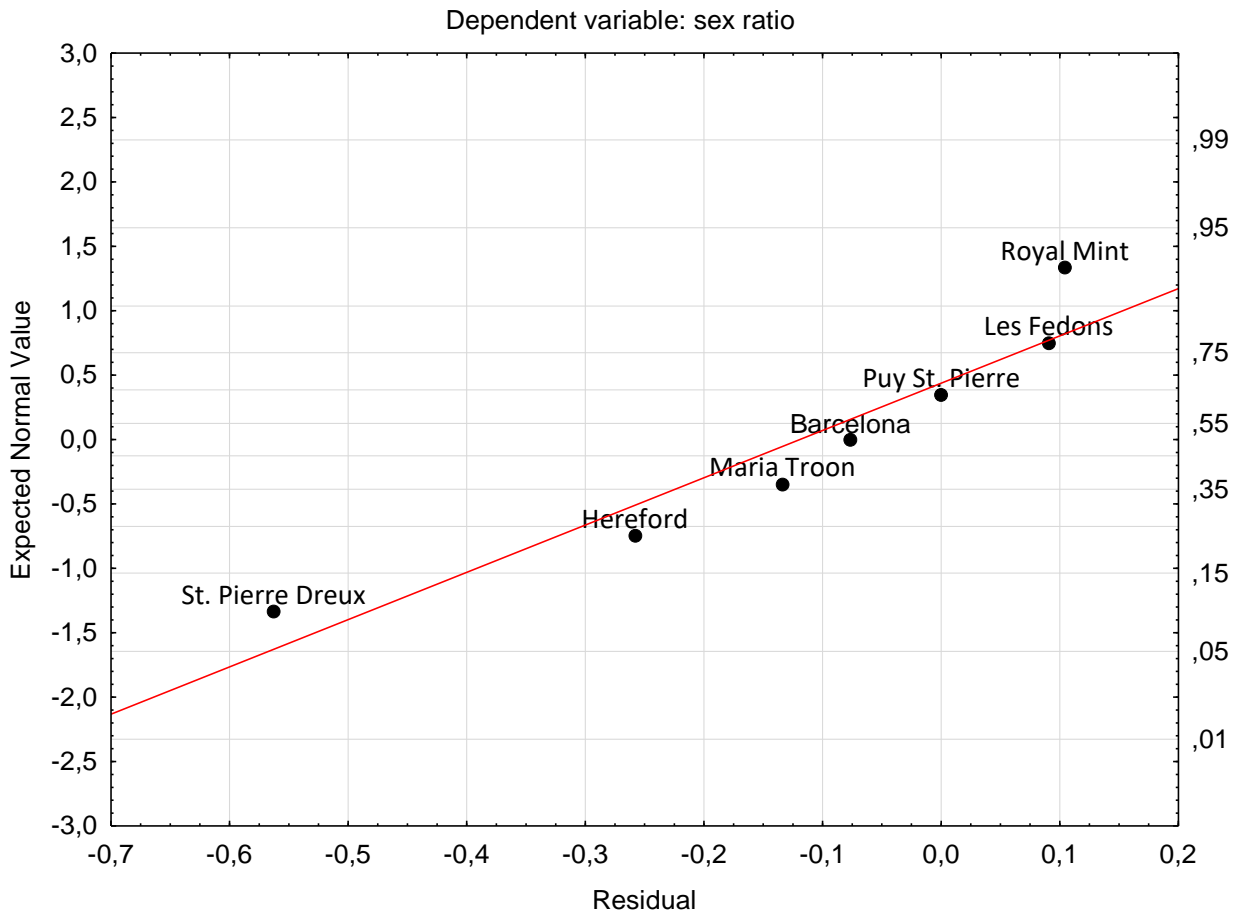

Supplementary Figure S1. Normal Probability Plot of Raw Residuals

## References

1. Staskiewicz, The early medieval cemetery at Aschheim-Bajuware. in *Skeletal series and their socioeconomic context. Documenta Archaeobiologiae 5* (eds Grupe, G. & Peters, J.) 35–56 (Verl. M. Leidorf, Rahden, 2007).
2. Seifert, L. *Mikroevolution und Geschichte der Pest: paläogenetische Detektion und Charakterisierung von Yersinia pestis, gewonnen aus historischem Skelettmaterial*. PhD thesis, Ludwig-Maximilians-Universität München (2014).
3. Feldman, M. *et al.* A High-Coverage Yersinia pestis Genome from a Sixth-Century Justinianic Plague Victim. *Mol. Biol. Evol.* **33**, 2911–2923 (2016).
4. Helmuth, H. & Ankner, D. *Das Reihengräberfeld von Altenerding in Oberbayern: Anthropologie, Damaszierung und Textilfunde* (von Zabern, Mainz, 1996).
5. Castex, D. De la composition par âge et par sexe des populations archéologiques à l'identification des grandes épidémies du passé. *CUDEP Bordeaux, Séance 4 - Dynamique des épidémies* **4**, (2007).
6. Drancourt, M. *et al.* Genotyping, Orientalis-like Yersinia pestis, and plague pandemics. *Emerg. Infect. Dis.* **10**, 1585 (2004).
7. Malou, N. *et al.* Immuno-PCR - A new tool for paleomicrobiology: The plague paradigm. *PLoS One* **7**, 10.1371/journal.pone.0031744 (2012).
8. Castex, D. Identification and interpretation of historical cemeteries linked to epidemics. *Paleomicrobiology past Human Infections* (eds Raoult, D. & Drancourt, M.), 23–48 (Springer, Berlin, 2008).
9. Castex, D. & Kacki, S. Demographic Patterns Distinctive of Epidemic Cemeteries in Archaeological Samples. *Microbiol. Spectr.* **4**, (2016).
10. Rigeade, C. & Bizot, B., Le Bot-Helly, A, Signoli, M. Une sépulture de pestiférés du Haut Moyen Âge à Vienne (Isère). *Archéologie du Midi médiéval* **27**, 19–29 (2009).
11. Drancourt, M. *et al.* Yersinia pestis Orientalis in remains of ancient plague patients. *Emerg. Infect. Dis.* **13**, 332–333 (2007).
12. Bianucci, R. *et al.* Technical note: A rapid diagnostic test detects plague in ancient human remains: An example of the interaction between archeological and biological approaches (southeastern France, 16th-18th centuries). *Am. J. Phys. Anthropol.* **136**, 361–367 (2008).
13. Rubini, M. *La necropoli di castro dei Volsci: problematiche ed aspetti di antropologia fisica*. (Ministero per i Beni Culturali e Ambientali, Roma, 1991).
14. Rubini, M., Gualdi-Russo, E., Manzon, V. S., Rinaldo, N. & Bianucci, R. Mortality risk factors show similar trends in modern and historic populations exposed to plague. *J. Infect. Dev. Ctries.* **10**, 488–493 (2016).
15. Waldron, T. Osteoarthritis in a Black Death cemetery in London. *Int. J. Osteoarchaeol.* **2**, 235–240 (1992).
16. Bos, K. I. *et al.* A draft genome of Yersinia pestis from victims of the Black Death. *Nature* **478**, 506–510 (2011).
17. Waldron, H. A. Are plague pits of particular use to palaeoepidemiologists? *Int. J. Epidemiol.* **30**, 104–108 (2001).
18. Margerison, B. J. & Knüsel, C. J. Paleodemographic comparison of a catastrophic and an attritional

- death assemblage. *Am. J. Phys. Anthropol.* **119**, 134–143 (2002).
19. Gowland, R. & Chamberlain, A. T. Detecting plague : palaeodemographic characterisation of a catastrophic death assemblage. *Antiquity* **79**, 146–157 (2005).
  20. DeWitte, S. N. *The paleodemography of the Black Death 1347-1351*. PhD Thesis, Pennsylvania State University (2006).
  21. DeWitte, S. N. Sex differentials in frailty in medieval England. *Am. J. Phys. Anthropol.* **143**, 285–297 (2010).
  22. DeWitte, S. N. Age patterns of mortality during the Black Death in London, AD 1349–1350. *J. Archaeol. Sci.* **37**, 3394–3400 (2010).
  23. Dewitte, S. N. Sex differences in periodontal disease in catastrophic and attritional assemblages from medieval london. *Am. J. Phys. Anthropol.* **149**, 405–416 (2012).
  24. DeWitte, S. N. & Hughes-Morey, G. Stature and frailty during the Black Death: the effect of stature on risks of epidemic mortality in London, AD 1348–1350. *J. Archaeol. Sci.* **39**, 1412–1419 (2012).
  25. Dewitte, S. & Slavin, P. Between Famine and Death : England on the Eve of the Black Death — Evidence from Paleoepidemiology and Manorial Accounts. *J. Interdiscip. Hist.* **44**, 37–60 (2013).
  26. Grainger, I. & Phillpotts, C. *The Cistercian abbey of St Mary Graces, East Smithfield, London*. (Museum of London Archaeology, London, 2011).
  27. Kacki, S. *Influence de l'état sanitaire des populations anciennes sur la mortalité en temps de peste. Contribution à la paléoépidémiologie*. PhD Thesis, University of Bordeaux, 2016).
  28. Haensch, S. *et al.* Distinct clones of *Yersinia pestis* caused the Black Death. *PLoS Pathog.* **6**, 10.1371/journal.ppat.1001134 (2010).
  29. Castex, D. & Kacki, S. Demographic Patterns Distinctive of Epidemic Cemeteries in Archaeological Samples. *Microbiol. Spectr.* **4**, (2016).
  30. Prechel, M. Anthropologische Untersuchungen der Skelettreste aus einem Pestmassengrab am Heiligen-Geist-Hospital zu Lübeck. *Lübecker Schriften zur Archäologie und Kult.* 3232–3339 (1996).
  31. Lütgert, S. A. Victims of the Great Famine and the Black Death? The archaeology of the mass graves found in the former graveyard of Holy Ghost Hospital, Lubeck (N. Germany), in the European context. *Hikuin* **27**, 255–264 (2000).
  32. Wiechmann, I., Harbeck, M. & Grupe, G. *Yersinia pestis* DNA sequences in late medieval skeletal finds, Bavaria. *Emerg. Infect. Dis.* **16**, 1806 (2010).
  33. Passarrius, O., Donat, R. & Catafau, A. *Vilarnau: un village du Moyen Âge en Roussillon*. (Éditions Trabucaire, Perpignan, 2008).
  34. Le Forestier, C. La Peste Noire à Bondy. *Bulletin de la Société historique du Raincy et du Pays de l'Aulnoye* **41**, 5-13 (2012).
  35. Tran, T. N. N., Le Forestier, C., Drancourt, M., Raoult, D. & Aboudharam, G. Brief communication: Co-detection of *Bartonella quintana* and *Yersinia pestis* in an 11th-15th burial site in Bondy, France. *Am. J. Phys. Anthropol.* **145**, 489–494 (2011).
  36. Kacki, S., Rahalison, L., Rajerison, M., Ferroglio, E. & Bianucci, R. Black Death in the rural cemetery of Saint-Laurent-de-la-Cabrerisse Aude-Languedoc, southern France, 14th century: Immunological evidence. *J. Archaeol. Sci.* **38**, 581–587 (2011).
  37. Crubézy, E., Duchesne, S. & Arlaud, C. *La mort, les morts et la ville (Montpellier–Xe–XVIe siècles)*.

(Editions Errance, Paris, 2006).

38. Raoult, D. *et al.* Molecular identification by ‘suicide PCR’ of *Yersinia pestis* as the agent of medieval black death. *Proc. Natl. Acad. Sci. U. S. A.* **97**, 12800–3 (2000).
39. Kacki, S. & Castex, D. La sépulture multiple de la basilique des Saints Martyrs Just et Pastor : bio-archéologie des restes humains. *Quad. d’Arqueologia i Història la Ciutat Barcelona* **10**, 180–199 (2014).
40. Beltrán de Heredia, J. & Gibrat, I. El primer testimoni arqueològic de la Pesta Negra a Barcelona: La fossa comuna de la basílica dels Sants Màrtirs Just i Pastor. *Quad. D’Arqueologia I Història La Ciutat Barcelona* **10**, 164–179 (2014).
41. Spyrou, M. A. *et al.* Historical *Y. pestis* Genomes Reveal the European Black Death as the Source of Ancient and Modern Plague Pandemics. *Cell Host Microbe* **19**, 874–881 (2016).
42. Gambaro, L. *et al.* La fouille de l’île du Lazzaretto Vecchio de Venise: premières données. in *La peste: entre épidémies et sociétés* (eds Signoli, M., Chev , D., Adalian, P., Bo tsch, G. & Dutour, O.) 97–103 (Firenze University Press, Firenze, 2001) 97–103 (Firenze University Press, Firenze, 2001).
43. Tran, T. N. N. *et al.* High throughput, multiplexed pathogen detection authenticates plague waves in medieval Venice, Italy. *PLoS One* **6**, 1–5, 10.1371/journal.pone.0016735 (2011).
44. Signoli, M., Gambaro, L., Rigeade, C. & Drusini, A. Les fouilles du Lazzaretto Vecchio (Venise, Italie). in *9e journ es d’anthropologie de Valbonne* (eds Buchet, L., Rigeade, C., S guy, I., Signoli, M.) 333–346 (Editions ADPCA, Antibes, 2008).
45. Bizot, B., Castex, D., Reynaud, P., Signoli, M. *La Saison d’une peste (avril-septembre 1590): Le cimet re des F dons   Lambesc (Bouches-du-Rh ne)*. (CNRS  ditions, Paris, 2005).
46. Drancourt, M., Aboudharam, G., Signoli, M., Dutour, O. & Raoult, D. Detection of 400-year-old *Yersinia pestis* DNA in human dental pulp: An approach to the diagnosis of ancient septicemia. *Proc. Natl. Acad. Sci. USA* **95**, 12637–12640 (1998).
47. Bianucci, R. *et al.* Plague immunodetection in remains of religious exhumed from burial sites in central France. *J. Archaeol. Sci.* **36**, 616–621 (2009).
48. Boucherie, A., Castex, D., Polet, C. & Kacki, S. Normal growth, altered growth? Study of the relationship between Harris lines and bone form within a post-medieval plague cemetery (Dendermonde, Belgium, 16th Century). *Am. J. Hum. Biol.* **29**, (2016).
49. Goudie Falkenbach E; Ryssaert C, Brion M, Castex D, Rouzic M, Colombo A, K. D. Archeologisch onderzoek in Dendermonde op de site van het voormalige Birginitessenklooster Maria Troon. *Archeol. Mediev.* **35**, 142–149 (2012).
50. Milanese, M. *Lo scavo del cimitero di San Michele ad Alghero (fine XIII–inizi XVII secolo)*. (Felici Ed., Pisa, 2010).
51. Bianucci, R., Giuffr , V., Ferroglio, E., Milanese, M. & Fornaciari, G. ‘Lo Quarter’: the Alghero plague cemetery (1582–1583 AD). *Journal of Biological Research della Societ  Italiana di Biologia Sperimentale* **85**, (2012).
52. Signoli, M. *et al.* D couverte d’un cimet re de pestif r s du xviii si cle (Puy-Saint-Pierre, Hautes-Alpes, France). in *Peste: entre  pid mies et soci t s*. (ed. M. Signoli, D. Chev , P. Adalian, G. Bo tsch, O. Dutour) 131–135 (Firenze University Press, Firenze, 2007).
53. Ardagna, Y., Tzortzis, S., Bizot, B. & Signoli, M. Profil pal opathologique d’un cimet re de pestif r s du xviii si cle (Puy-Saint-Pierre, Hautes-Alpes, France). *Antropo* **27**, 63–72 (2012).

54. Hadjouis, D., LA VU, D., Aboudharam, G., Drancourt, M. & Andrieux, P. Présence de la peste (*Yersinia pestis*) dans le cimetière protestant de Saint-Maurice au XVII<sup>ème</sup> siècle (Val-de-Marne, France). *Archéologie et microbiologie. Paleobios*, 14 (2006).
55. Rinaldo, N., Manzon, V. S., Muro, X. G. & Gualdi-russo, E. La peste del 1630: analisi antropologiche preliminari dei resti scheletrici provenienti dal complesso dell' Osservanza di Imola. *Ann. dell'Università di Ferrara Museol. Sci. e Nat.* **10**, 135–140 (2014).
56. Cervellati, I. La comunità imolese e la peste del 1630-2. in *Pagine di vita e di storie imolesi* (Ed. Cars, Imola, 1986).
57. Caruso, V. *et al.* Gli scheletri della fossa comune di viale Sabotino a Milano: le vittime della peste manzoniana? *The Journal of Fasti Online* **2**, 1–11 (2013).
58. Dutour, O., Signoli, M., Georgeon, E. & DA SILVA, J. Le charnier de la Grande Peste de Marseille (rue Leca): données de la fouille de la partie centrale et premiers résultats anthropologiques. *Préhistoire Anthropol. méditerranéennes* **3**, 191–203 (1994).
59. Bos, K. I. *et al.* Eighteenth century *Yersinia pestis* genomes reveal the long-term persistence of an historical plague focus. *Elife* **5**, 1–11 10.7554/eLife.12994 (2016).
60. Signoli, M. & Dutour, O. Le charnier du couvent de l'Observance: 1722. *Provence Hist. fasc* **189**, 469–488 (1998).
61. Bello, S. M., Thomann, A., Signoli, M., Dutour, O. & Andrews, P. Age and sex bias in the reconstruction of past population structures. *Am. J. Phys. Anthropol.* **129**, 24–38 (2006).
62. Signoli, M., Séguy, I., Biraben, J.-N., Dutour, O. & Belle, P. Paleodemography and historical demography in the context of an epidemic. *Population (Paris)*. **57**, 829–854 (2002).
63. Signoli, M. Archéo-anthropologie funéraire et épidémiologie. *Socio-anthropologie* **22**, 107–122 (2008).
64. Chaumoitre, C., Signoli, M., Dutour, O. & Panuel, M. Analyse des stries d'arrêt de croissance sur deux populations du XVIII<sup>ème</sup> siècle provenant de charniers de peste de Marseille et Martigues. in *LA PESTE entre épidémies sociétés.* (ed. Signoli M. , Chevé D. , Adalian P. , Boëtsch G. et Dutour O.) 83–89 (Erga, Firenze, 2007).
65. Signoli, M., Chausserie-Laprée, J. & Dutour, O. Etude anthropologique d'un charnier de la peste de 1720-1721 à Martigues. *Préhistoire Anthropol. méditerranéennes* **4**, 173–189 (1995).
66. Tzortzis, S. & Signoli, M. Les tranchées des Capucins de Ferrières (Martigues, Bouches-du-Rhône, France). Un charnier de l'épidémie de peste de 1720 à 1722 en Provence. *Comptes Rendus Palevol* **8**, 749–760 (2009).
67. Fiscella, G. N., Bennike, P. & Lynnerup, N. Transverse-" Harris"-Lines in a Skeletal Population from the 1711 Danish Plague Site. *Anthropologischer Anzeiger* **66**, 129–138 (2008).
